# Supplementary material
Source: PubMed Central journal article supplement (PMC7164131)

Figure S1

A.

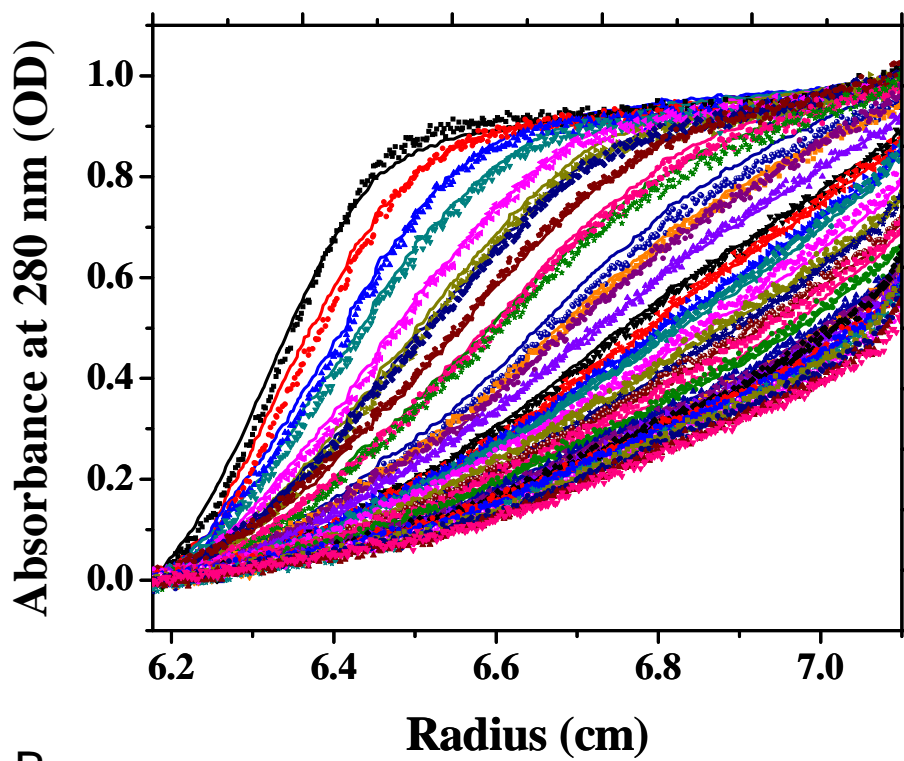

B.

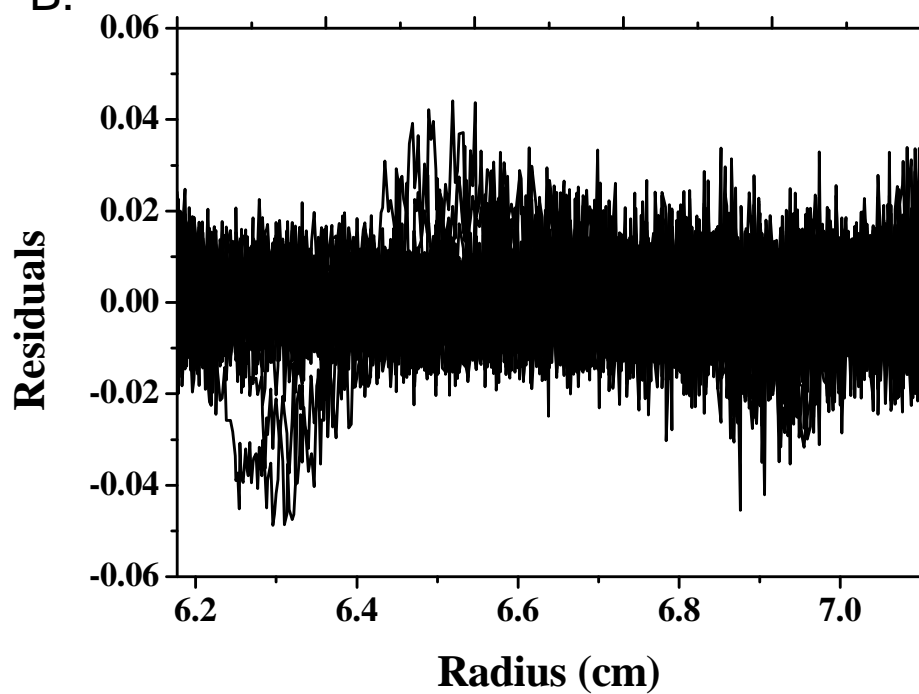

## Figure S2

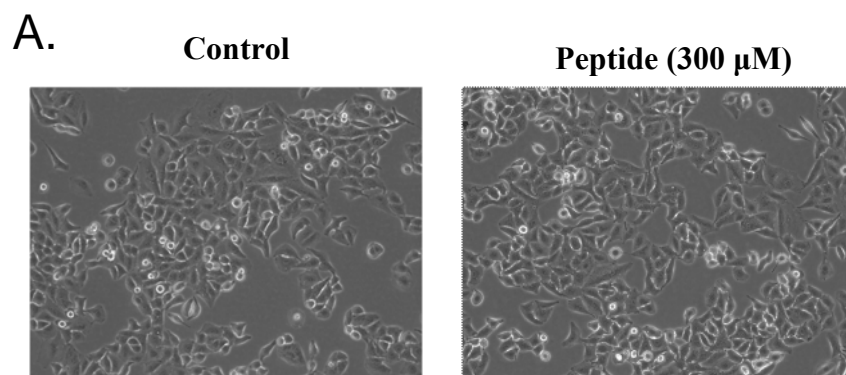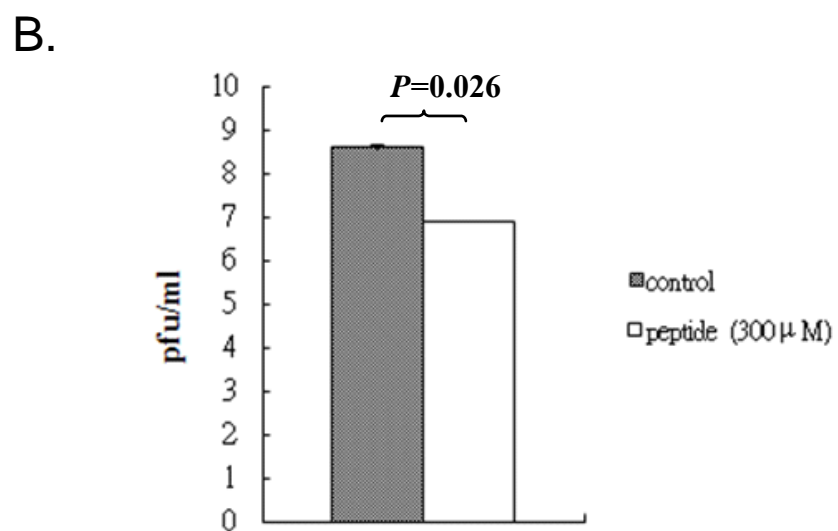

**Figure S3**

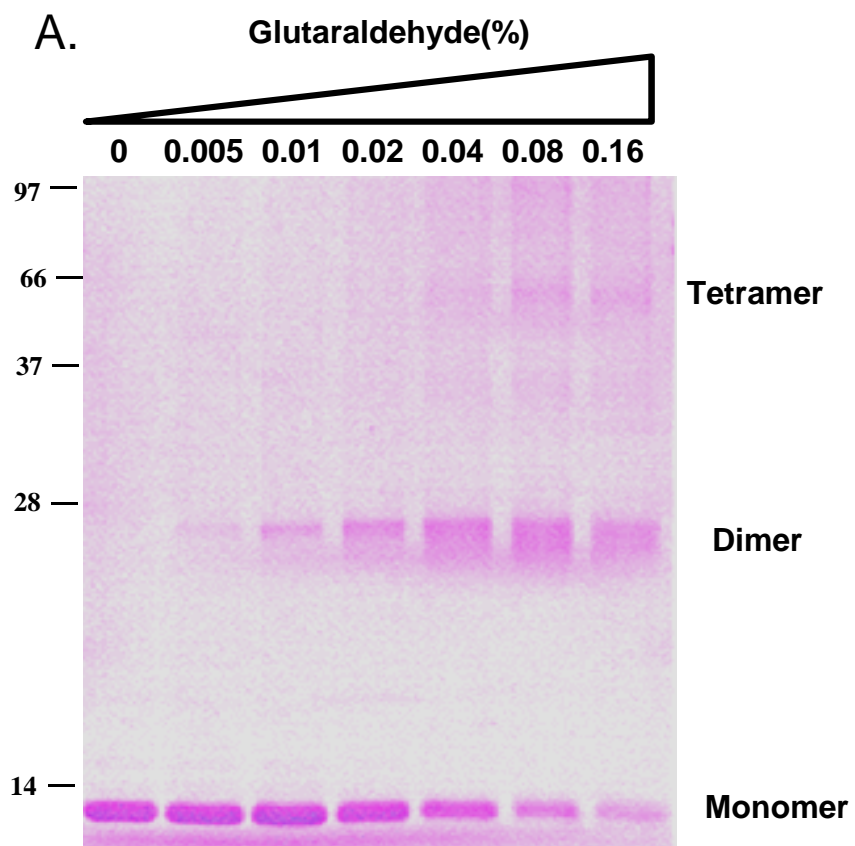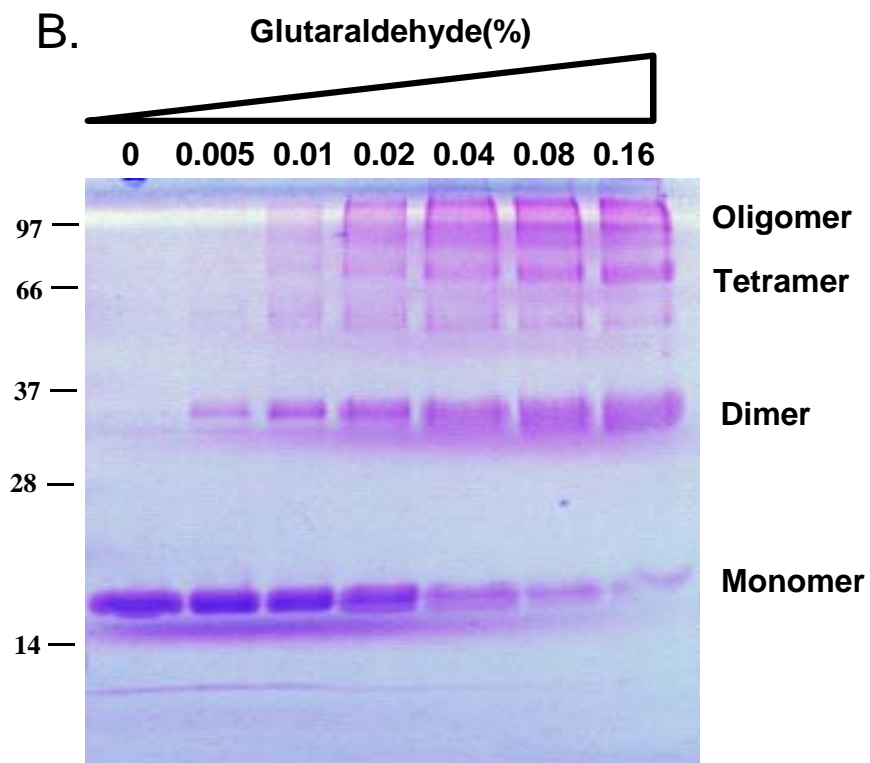

## Figure S4

|         |     |                                                        |     |
|---------|-----|--------------------------------------------------------|-----|
| OrigSeq | 245 | EKPRWKRPNDVTSNVTQCFGPRDLDFHFGSAGVVANGVKAKGYPQFAELVPS   | 298 |
| Jnet    | 245 | -----E-----EEEE-----HHHHHHH-----HHHH-----              | 298 |
| jhmm    | 245 | -----EEEE-----HHHHHHH-----HHHH-----                    | 298 |
| jpssm   | 245 | -----E-----EEEE-----HHHHHHH-----HEHH-----              | 298 |
| FI-Pred | 245 | -----HHHH-----HHHH-----                                | 298 |
| Porter  | 245 | ---H-----HHHH-----HHHH-----HHHH-----                   | 298 |
| APSSP2  | 245 | -----HHHH-----HHHH-----E-----                          | 298 |
| PROF    | 245 | -----EEEE-----HHHH-----HHHE-----                       | 298 |
|         |     |                                                        |     |
| OrigSeq | 299 | TAAMLFDSHIVSKESGNTVVLTFTRVTVPKDHPHLGKFLLEELNAFTREMQQHP | 354 |
| Jnet    | 299 | HHHH-----EEEEEEEEEEEE-----HHHHHHHHHH-----              | 354 |
| jhmm    | 299 | HHHH-----EEEEEEEEEEEE-----HHHHHHHHHH-----              | 354 |
| jpssm   | 299 | HHHH-----EEEEEEEEEEEE-----HHHHHHHHHH-H-----            | 354 |
| FI-Pred | 299 | --EEEE--EEE-----EEEEEEEEEEEE-----HHHHHHHHHHHH-----     | 354 |
| Porter  | 299 | HHHH--EEEE-----EEEEEEEEEEEE-----HHHHHHHH-----          | 354 |
| APSSP2  | 299 | HHHH--E-EEEE-----EEEEEEEEEEEE-----HHHHHHHHHHHH-----    | 354 |
| PROF    | 299 | -EEEE--EEE-----EEEEEEEEEEEE-----HHHHHHHHHH-----        | 354 |
|         |     |                                                        |     |
| OrigSeq | 355 | LLNPSALEFNPSQTSPATAEVRDEVS IETDI IDEVN                 | 389 |
| Jnet    | 355 | -----EEEE-----                                         | 389 |
| jhmm    | 355 | -----EEEE-----                                         | 389 |
| jpssm   | 355 | -----EEEE-----                                         | 389 |
| FI-Pred | 355 | -----EEEE-----                                         | 389 |
| Porter  | 355 | -----HHH-----EEEE-----                                 | 389 |
| APSSP2  | 355 | -----E-EEEE-----                                       | 389 |
| PROF    | 355 | -----EEEE-----                                         | 389 |

Figure S5

```
229E 245 QKPRWKRQPNDDYTSNYTQCFGPRDLH---NFGSAGVYVANGYKAKGYPPQ 291
OC43 NKPRQKRSPNKQC--TVQQCFGKRGPNQ---NFGGGEMLKLGTSDPQFPI
SARS KKPRQKRTATKQY--NYTQAFGRRGPEQTQGNFGDQDLIRQGTDYKQWPQ
IBV HRRYCKRTIPPNY--RYDQYFGPRTKGK-EGNFGDDKHNEEGIKDGRVTA

229E 292 FAELVPSTAAMLFDSHIYS-----KESGNTVYVLTFTTRYTVPKD 330
OC43 LAELAPTAGAFFFGSRLELAKYQNLSGNPDEPQKDYYELRYNGAIRFDST
SARS IAQFAPSASAFFGMSRIGM-----EYTPSGTALTYHGAIKLDDK
IBV MLNLVPSSHAFLFGSRVTP-----KLQLDGLHLRFEFTTVYPCD

229E 331 HPHLGKFLEELNAFTREMQQHPLLNP SALEFNPSQTSPATAEPYRDEVSI 380
OC43 LSGFETIMKYLVNENLNAYQQQDGMNMSPKPQR-QR--GHKNGQGENDNI
SARS DPQFKDNVILLNKHIDAYKTFPPTEPKKDKKKKTD--AQPLPQRQKKQP
IBV DPQFDNYVKICDQCVDGVGTRPKDDEPKPKSRSSSRPATRGNSPAPRQR

229E 381 ETDIIDEVN 389
OC43 SVAYPKSRVQQNKSRELTAEDISLLKKMDEPYTEDTSEI
SARS TYTLLPADMDDFSRLQNSMSGASADSTQA
IBV PKKEKLLKKQDDEADKALTSDEERNNAQLEFYDEPKVINWGDAAALGENEL
```

# Figure S6

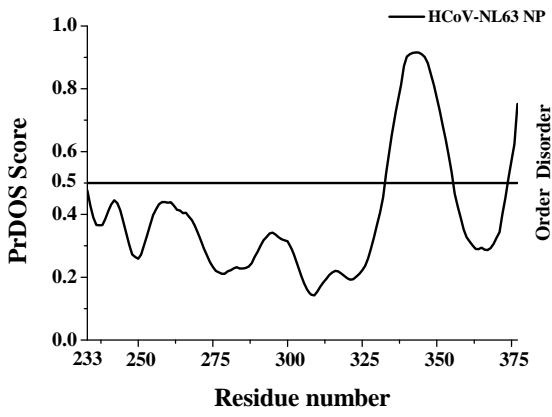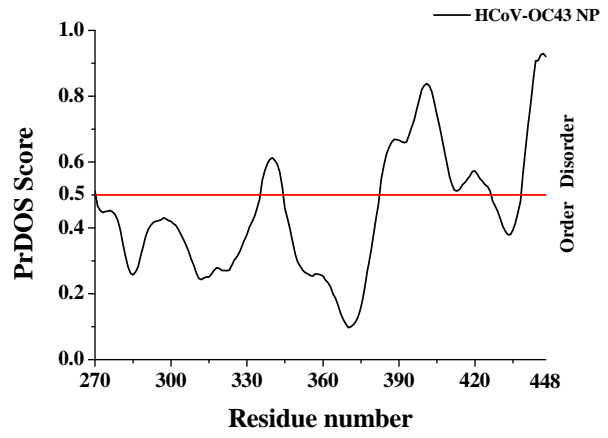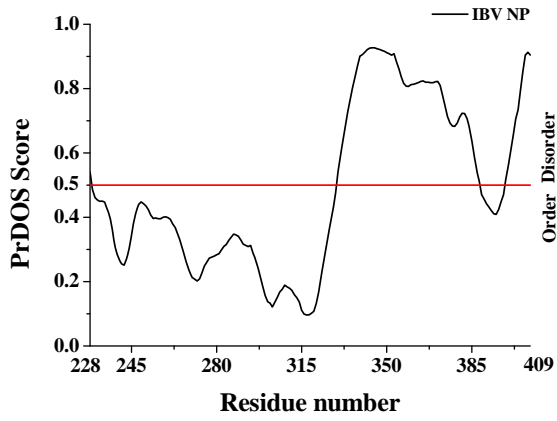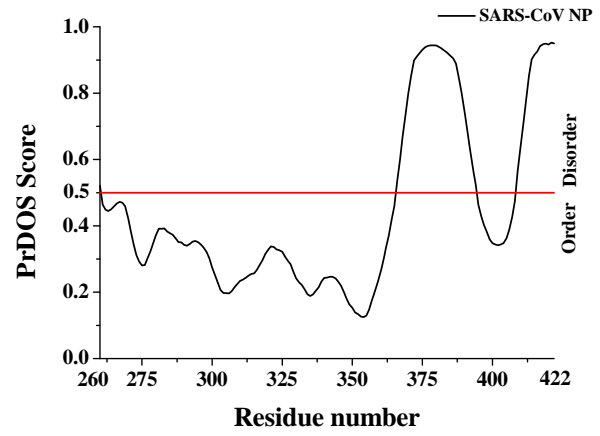

Supplement: FEB2-587-120-s002.pdf [file FEB2-587-120-s002.pdf]
